# Supplementary material for: Yeast communities of secondary peat swamp forests in Thailand and their antagonistic activities against fungal pathogens cause of plant and postharvest fruit diseases
Source: PubMed Central journal article supplement (PMC7075701; doi:10.1371/journal.pone.0230269), 2020-03-16
Supplement: pone.0230269.s001.pdf [file pone.0230269.s001.pdf]

**S1 Table. Potential new yeast species.**

| Strain DMKU-                                       | Closest species                                                                 | Nucleotide substitution/<br>gap/total nt. |              | GenBank accession<br>no. (D1D2/ITS) | Identification result                                                  |
|----------------------------------------------------|---------------------------------------------------------------------------------|-------------------------------------------|--------------|-------------------------------------|------------------------------------------------------------------------|
|                                                    |                                                                                 | D1/D2 region                              | ITS region   |                                     |                                                                        |
| Yeast of in Kuan Kreng peat swamp forest           |                                                                                 |                                           |              |                                     |                                                                        |
| Phylum Ascomycota                                  |                                                                                 |                                           |              |                                     |                                                                        |
| ESS 6-3                                            | <i>Galactomyces candidus</i> CBS 772.71 <sup>T</sup><br>(U40118/ HE663404)      | 11-12/1/546                               | 1-11/0-4/253 | LC506247, LC506273                  | } Potential new species closet<br>to <i>Galactomyces candidus</i>      |
| ESS10-1                                            |                                                                                 |                                           |              | LC506261, LC506276                  |                                                                        |
| ESS11-3                                            |                                                                                 |                                           |              | LC506270, LC506278                  |                                                                        |
| Yeast of Rayong botanical garden peat swamp forest |                                                                                 |                                           |              |                                     |                                                                        |
| Phylum Basidiomycota                               |                                                                                 |                                           |              |                                     |                                                                        |
| ESS15-3                                            | <i>Papiliotrema</i> sp. DMKU-CE120<br>(LC178811)                                | 1/0/568                                   | 4/3/478      | LC506413, LC506419                  | } Potential new species closet to<br><i>Papiliotrema laurentii</i>     |
|                                                    | <i>Cryptococcus</i> sp. YS NB5 (AM397842)                                       | 1/0/555                                   | -            |                                     |                                                                        |
|                                                    | <i>Papiliotrema laurentii</i> CBS 139 <sup>T</sup><br>(AF075469/LK023833)       | 2/0/568                                   | 6/2/425      |                                     |                                                                        |
| SPS12-1                                            | <i>Moesziomyces parantarctica</i> CBS 10005 <sup>T</sup><br>(AB089357/AB089356) | 2/0/560                                   | 35/29/649    | LC420624, LC420629                  | } Potential new species closet to<br><i>Moesziomyces parantarctica</i> |
| SPS14-4                                            |                                                                                 |                                           |              | LC420625, LC420630                  |                                                                        |
| SPS15-2                                            |                                                                                 |                                           |              | LC420626, LC420631                  |                                                                        |
| SPS17-1                                            |                                                                                 |                                           |              | LC420627, LC420632                  |                                                                        |
| ESS13-5                                            |                                                                                 |                                           |              | LC420628, LC420633                  |                                                                        |

Yeast strains of potential new yeast species isolated from Kuan Kreng and Rayong botanical garden peat swamp forests
